# Supplementary material
Source: Springer Nature journal article supplement (https://www.springermedizin.de/resource/supplementary/12933_2011_380_MOESM1_ESM.pdf/9538320)

**Normal  
Glucose  
5.6 mM**

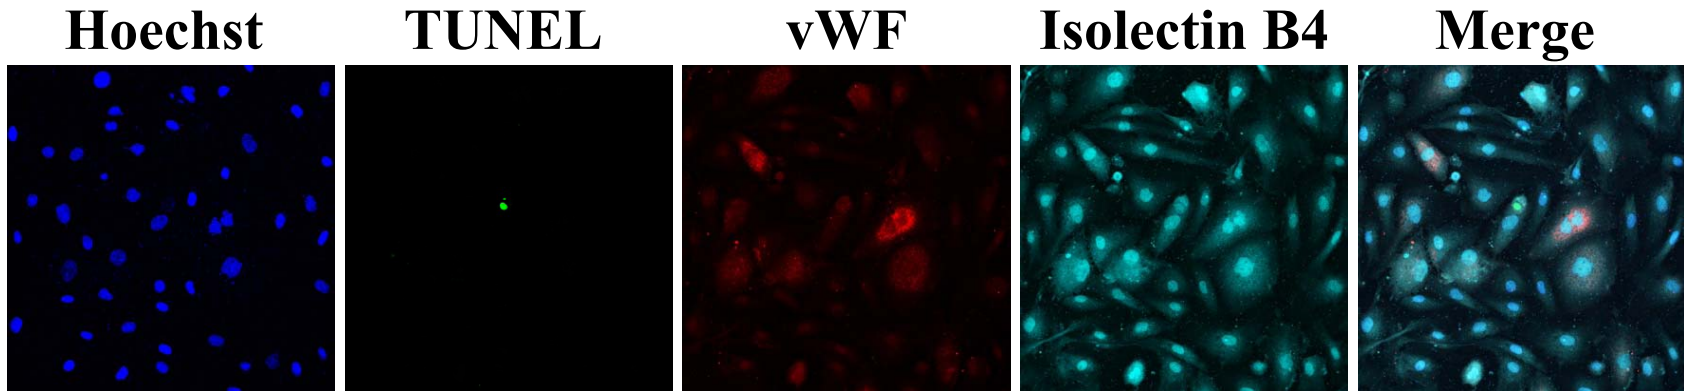

**High  
Glucose  
16.7 mM**

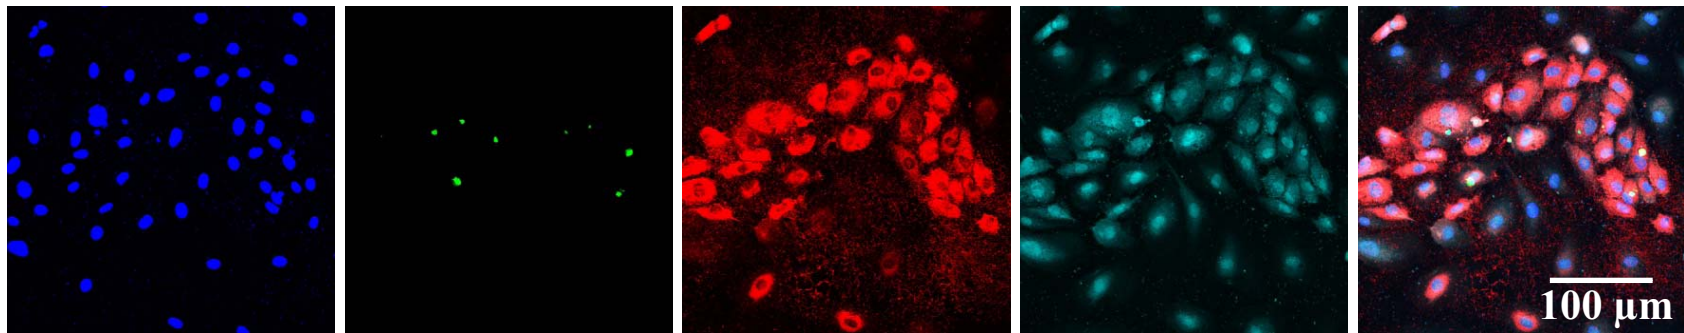

Supplement: MOESM1 [file 9538320]
